# Supplementary material for: Antibiotic prescribing in primary care, adherence to guidelines and unnecessary prescribing - an Irish perspective
Source: PubMed Central journal article supplement (PMC3430589; doi:10.1186/1471-2296-13-43), 2012-05-28
Supplement: 1471-2296-13-43-S1.pdf [file 1471-2296-13-43-S1.pdf]

## Antibiotic Review - Data Collection Form

Please complete using a black biro. Mark Boxes like this  and write only in spaces provided.

### Section 1

Q1. Date of Consultation   /   /     (e.g. DD/MM/YYYY)

Q2. Age   years/  
months or Date of Birth   /   /

Q3. Gender  Male  Female

Q4. GMS  Yes  No

Q5. Reason for Encounter/Diagnosis

Q6. Was an antibiotic prescribed at this consultation?  Yes  No  
(If Yes continue to Section 2)

### Section 2

Q7. Name of antibiotic prescribed (if known allergy please state)

Q8. Dose Information

a. Times per day   (e.g. three times daily = 03)

b.     mgs (e.g. 1000mgs) OR   .   mls (e.g. 01.25 mls)

c. For how many days   (e.g. 7 days = 07 )

Q9. For immediate or deferred use?  Immediate Use  Deferred Use

Q9a. Do you believe this antibiotic was definitely necessary?

Yes  No  Not Sure

Q9b. If no or not sure, please explain

Q10. Was another antibiotic recently prescribed for the same condition?  
(<2 weeks ago, if Yes provide details below)  Yes  No

### Section 3 - OFFICE USE ONLY - NOT TO BE COMPLETED BY GP

Q11. Compliant with guidelines?  Yes  No

Q12. Deviation from guidelines - specify
